# Supplementary material for: Optic Nerve Head Myelin-Related Protein, GFAP, and Iba1 Alterations in Non-Human Primates With Early to Moderate Experimental Glaucoma
Source: PubMed Central journal article supplement — Invest Ophthalmol Vis Sci. 2022 Oct 14;63(11):9. doi: 10.1167/iovs.63.11.9 (PMC9586137; doi:10.1167/iovs.63.11.9), 2022-10-14
Supplement: iovs-63-11-9_s001.pdf [file iovs-63-11-9_s001.pdf]

| NHP #                       | Region | MBP            |                              | CNPase          |                               | GFAP            |                              | Nuclei           |                                 | Iba1           |                                |
|-----------------------------|--------|----------------|------------------------------|-----------------|-------------------------------|-----------------|------------------------------|------------------|---------------------------------|----------------|--------------------------------|
|                             |        | C              | EG                           | C               | EG                            | C               | EG                           | C                | EG                              | C              | EG                             |
| 1                           | Lamina | NP             | NP                           | NP              | NP                            | 1196.6<br>399.7 | <b>437.4</b><br><b>114.9</b> | 1771.6<br>1038.5 | <b>2387.5</b><br><b>1268.9</b>  | 714.9<br>749.1 | 705.1<br>871.8                 |
|                             | RL1    | 521.8<br>108.4 | <b>304.3</b><br><b>76.8</b>  | 2131.0<br>612.9 | <b>895.3</b><br><b>284.4</b>  | 652.6<br>140.5  | 498.3+<br>149.1              | 1715.8<br>915.9  | <b>2415.2+</b><br><b>1458.7</b> | 713.7<br>741.7 | 1612.4+<br>1424.9              |
|                             | RL2    | 570.5<br>111.4 | 483.9<br>85.3                | NA              | NA                            | NA              | NA                           | NA               | NA                              | NA             | NA                             |
| 2                           | Lamina | NP             | NP                           | NP              | NP                            | 641.9<br>151.9  | 473.1<br>174.3               | 1405.0<br>895    | 2039.9<br>1437.3                | 790.3<br>863.3 | 1016.3<br>1218.1               |
|                             | RL1    | 444.9<br>97.5  | <b>257.6</b><br><b>31.1</b>  | 1114.6<br>281.9 | <b>337.5</b><br><b>40.3</b>   | 623.4<br>126.6  | <b>431.5</b><br><b>102</b>   | 1159.8<br>637.9  | <b>1559.2</b><br><b>917.8</b>   | 822.2<br>627.4 | 1149.2<br>755.3                |
|                             | RL2    | 503.5<br>101.5 | <b>370.8</b><br><b>67.2</b>  | 1247.7<br>238.9 | <b>458.2</b><br><b>109.3</b>  | 662.7<br>114.7  | <b>394.4</b><br><b>61</b>    | 1129.0<br>610.3  | <b>1613.6</b><br><b>793.8</b>   | 769.6<br>470.6 | <b>1271.6</b><br><b>751.2</b>  |
| 3                           | Lamina | NP             | NP                           | NP              | NP                            | 838.8<br>180.9  | <b>588.4</b><br><b>109.9</b> | 1617.4<br>744.4  | 1507.7<br>730.4                 | 747.7<br>581.9 | <b>1092.8</b><br><b>674.7</b>  |
|                             | RL1    | 518.4<br>84.0  | <b>434.5</b><br><b>110.2</b> | 1882.2<br>765.1 | <b>770.6</b><br><b>292.7</b>  | 927.2<br>287.2  | 648.9<br>132.4               | 1421.8<br>615.7  | 1513.0<br>810.9                 | 937.2<br>577.6 | 1016.2<br>720.8                |
|                             | RL2    | 619.9<br>53.8  | 530.2<br>108.6               | 2284.6<br>674.1 | <b>1093.1</b><br><b>330.5</b> | 804.6<br>237.3  | 655.2<br>143.4               | 1338.6<br>559.4  | 1703.0<br>812.1                 | 914.4<br>581.5 | 1338.6<br>930.0                |
| 4                           | Lamina | NP             | NP                           | NP              | NP                            | 630.7<br>183.7  | <b>434.9</b><br><b>84.4</b>  | 1915.2<br>1586   | 2150.7<br>1682.6                | 579.4<br>704.5 | 577.6<br>827                   |
|                             | RL1    | 616.6<br>132.5 | <b>445.2</b><br><b>129</b>   | 1130.6<br>262.5 | 431.1+<br>84.2                | 616.1<br>114.7  | 520.1+<br>149.1              | 1582.5<br>821.6  | <b>1614.8+</b><br><b>932.7</b>  | 682.5<br>736.7 | 585.5+<br>713.4                |
|                             | RL2    | 691.9<br>45.1  | <b>509.8+</b><br><b>92.8</b> | NA              | NA                            | NA              | NA                           | NA               | NA                              | NA             | NA                             |
| Experiment wide<br>(4 NHPs) | Lamina | NP             | NP                           | NP              | NP                            | 827.3<br>339.9  | <b>483.4</b><br><b>139.7</b> | 1618.8<br>1093.3 | <b>1887.3</b><br><b>1258.9</b>  | 734.3<br>833.6 | <b>941.5</b><br><b>1138.4</b>  |
|                             | RL1    | 525.9<br>123   | <b>360.8</b><br><b>124.5</b> | 1664.8<br>721.9 | <b>649.6</b><br><b>330.1</b>  | 719.4<br>233.8  | <b>527.2</b><br><b>151.4</b> | 1408.2<br>821    | <b>1741.8</b><br><b>1139.5</b>  | 836.6<br>738   | <b>1148.7</b><br><b>1058.5</b> |
|                             | RL2    | 577.5<br>109.9 | <b>464.5</b><br><b>110.5</b> | 1766.1<br>724.3 | <b>775.7</b><br><b>401.8</b>  | 733.7<br>199.3  | <b>524.9</b><br><b>170.8</b> | 1247.4<br>640.4  | <b>1662.3</b><br><b>829.5</b>   | 851.2<br>574.9 | <b>1308.1</b><br><b>876.4</b>  |

**Supplementary Table 1. CNPase, MBP GFAP fluorescence intensity per unit area and Nuclei, Iba1 pixel clusters per mm<sup>2</sup>.** Values in the table are Mean  $\pm$  STDEV (lower size font). EG values that are marked bold are significant (also see Table 2). In NHP 1 and 4, the retrolaminar nerve within the paraffin sections was short and the RL2 region therefore could not be analyzed for all antibodies except MBP. The absence of RL2 data in these animals is denoted by NA. Experiment wide (EW) data for the RL2 region for these is thus based on two animals (NHP 2 and 3). (+) Denotes that in some instances, individual C or EG eyes had fewer than n=4 sections with usable IHC data.
